# Supplementary material for: The PERK Inhibitor GSK2606414 Enhances Reovirus Infection in Head and Neck Squamous Cell Carcinoma via an ATF4-Dependent Mechanism
Source: PubMed Central journal article supplement (PMC7047134; doi:10.1016/j.omto.2020.01.001), 2020-01-17
Supplement: mmc1.pdf [file mmc1.pdf]

**OMTO, Volume 16**

**Supplemental Information**

**The PERK Inhibitor GSK2606414 Enhances  
Reovirus Infection in Head and Neck Squamous  
Cell Carcinoma via an ATF4-Dependent Mechanism**

**Martin McLaughlin, Malin Pedersen, Victoria Roulstone, Katharina F. Bergerhoff, Henry G. Smith, Harriet Whittock, Joan N. Kyula, Magnus T. Dillon, Hardev S. Pandha, Richard Vile, Alan A. Melcher, and Kevin J. Harrington**

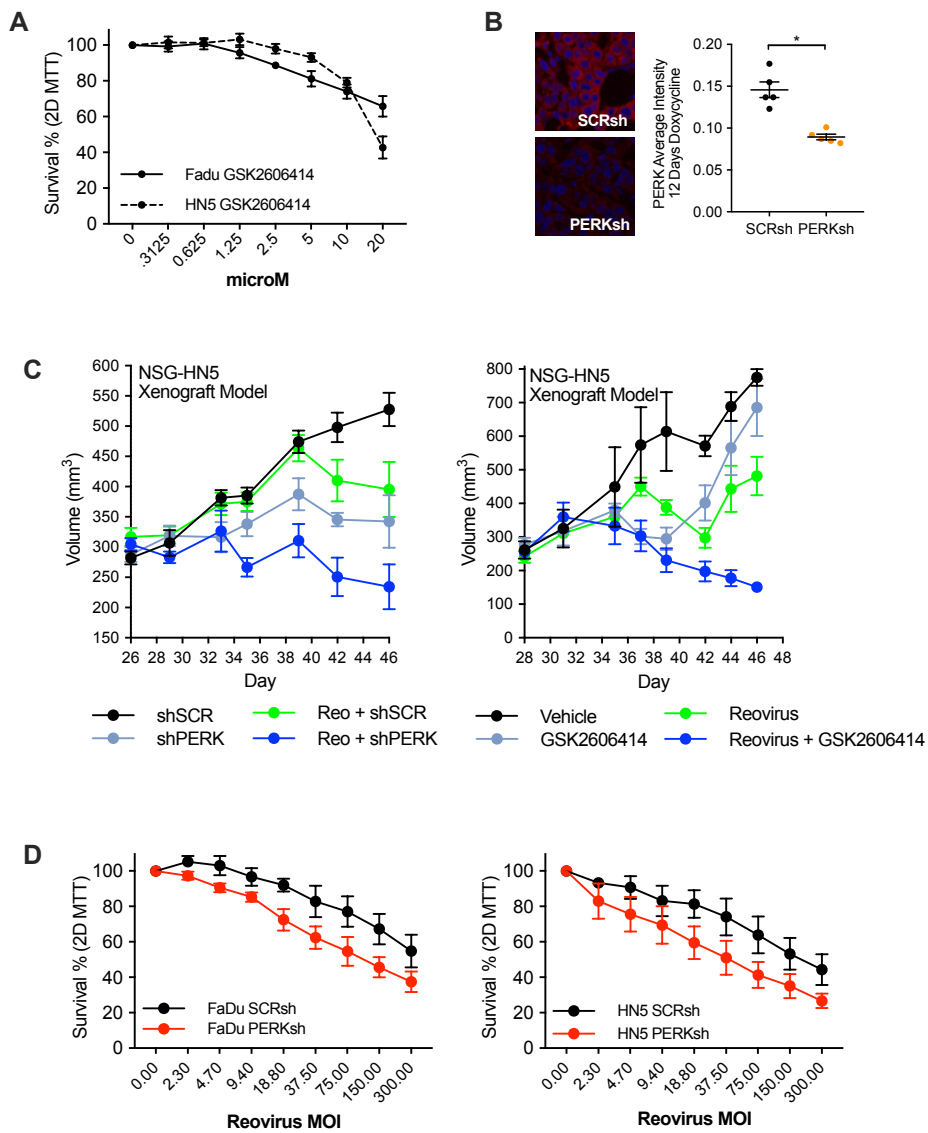

**Supplementary Figure S1. Additional viability and growth curves to data in Figure 1.** (A) Survival data for GSK2606414 alone in FaDu and HN5 cell lines measured at 72 h by MTT assay. (B)  $2 \times 10^6$  HN5 cells stably expressing lentiviral Tet-pLKO-puro were injected subcutaneously into NSG mice. HN5 cells contained scrambled shRNA (SCRsh) or PERK targeting shRNA (PERKsh). All mice received 50 mg/Kg doxycycline daily by gavage. After 12 days FFPE tumors were sectioned and stained by IHC to validate PERK knockdown. PERK levels were measured by automated image quantification using cell profiler. Example images of staining quality are shown for each. Data  $\pm$ SEM with with statistical analysis by unpaired t-test  $*P < 0.05$ . Individual data points correspond to values for one tumor. (C) Corresponding volume data in  $\text{mm}^3$  from figures 1F and 1G. (D) Survival as measured by MTT assay for reovirus in FaDu and HN5 cells with scrambled or PERK shRNA. Cells were treated with 400  $\mu\text{g}/\text{mL}$  doxycycline for 96 h before the addition of reovirus. Cells were maintained in doxycycline until the end of the assay at 72 h. Data shown in both A and D are from a minimum of three independent experiments.

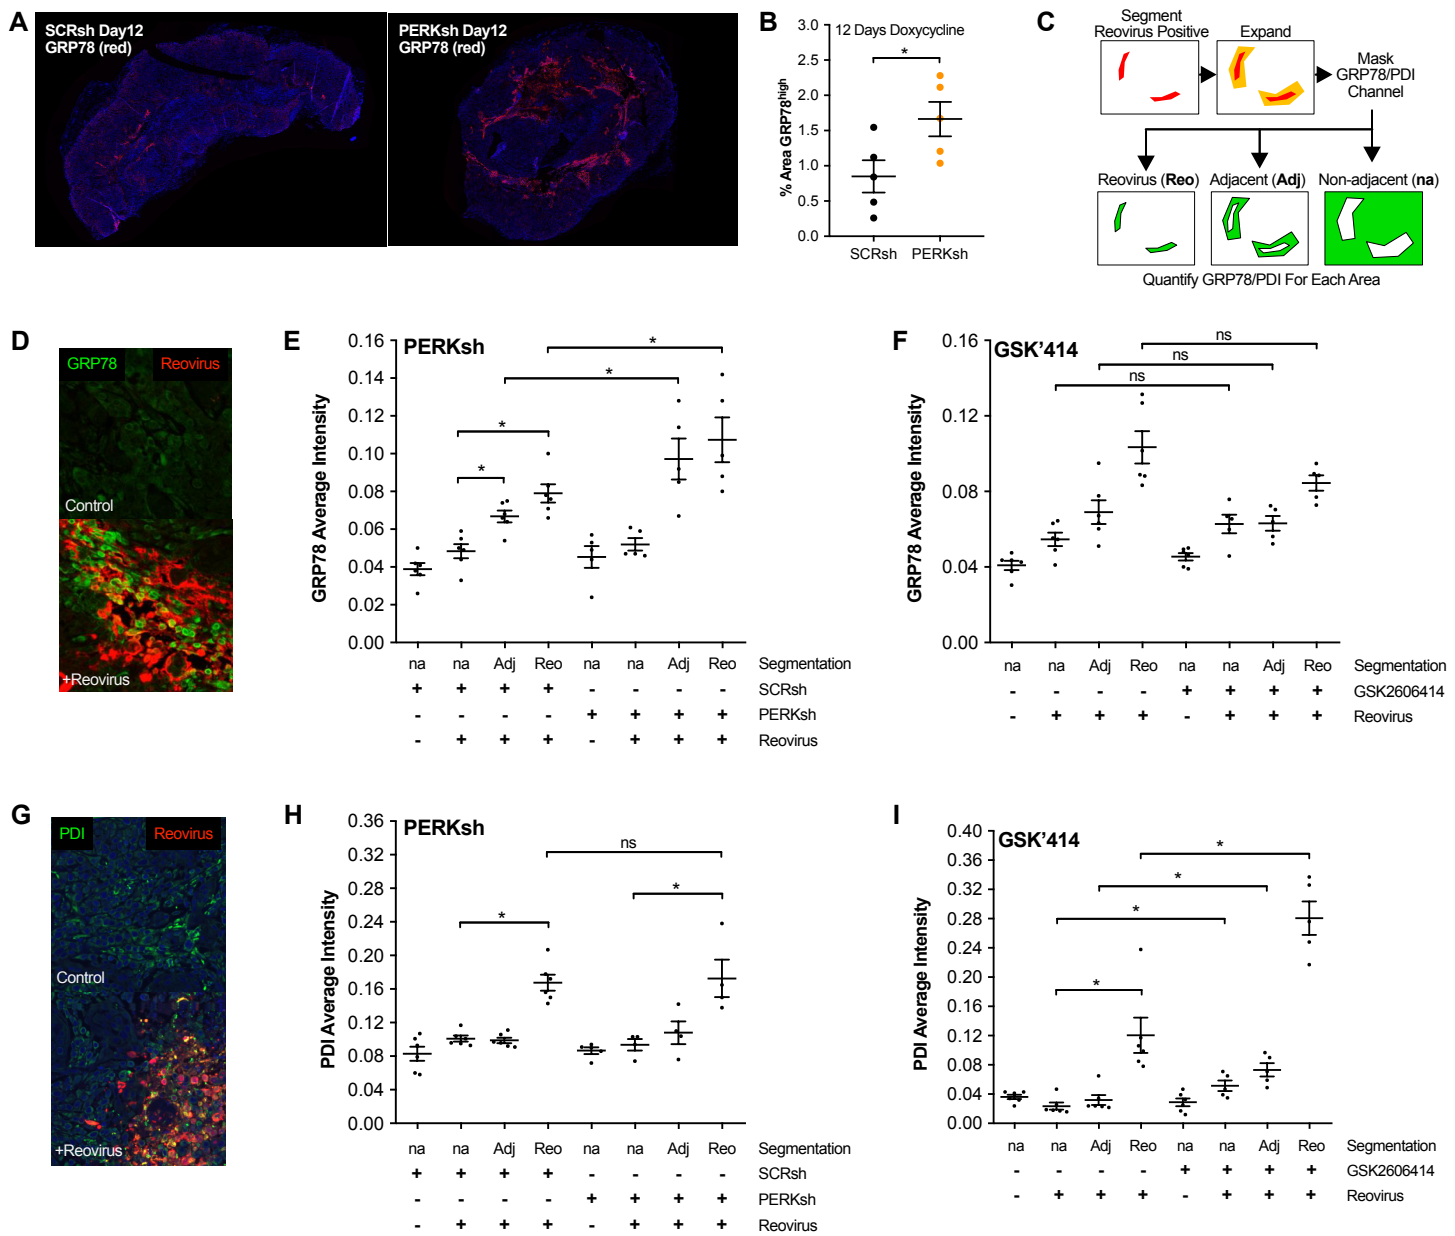

**Supplementary Figure S2. Modulation of reovirus induced GRP78 and PDI *in vivo* by PERK knockdown or GSK2606414.**

(A)  $2 \times 10^6$  HN5 cells stably expressing lentiviral Tet-pLKO-puro were injected subcutaneously into NSG mice. HN5 cells contained scrambled shRNA (SCRsh) or PERK targeting shRNA (PERKsh). All mice received doxycycline daily by gavage. After 12 days FFPE tumors were sectioned and stained by IHC to assess changes to levels of the ER chaperone GRP78. (B) GRP78 high levels were quantified as in figure 3. (C) FFPE *in vivo* tumors at the end of experiments in figures 1F and 1G were co-stained for reovirus and GRP78 or PDI by IHC and imaged using the Vectra 3 imaging system from Perkin Elmer. Images were subject to automated image analysis using cell profiler. A schematic overview of the segmentation used in panels D-I to quantify GRP78 and PDI in areas positive for reovirus (Reo), adjacent to reovirus (Adj) and outside these two areas classified as non-adjacent (na). The area expanded by 10 microm around reovirus positive areas equals approximately 1-2 cell widths immediately adjacent to reovirus infected areas with each Vectra image  $525 \times 700$  microm in total. (D) Representative images of reovirus mu1C and GRP78 staining. (E,F) Comparison between the impact of PERK knockdown or GSK2606414 on GRP78 levels induced by reovirus infection. (G) Representative images of reovirus mu1C and PDI staining. (H,I) Comparison between the impact of PERK knockdown or GSK2606414 on PDI levels induced by reovirus infection. All panel data  $\pm$ SEM with statistical analysis by unpaired t-test \*P < 0.05. Individual data points correspond to values for one tumor.

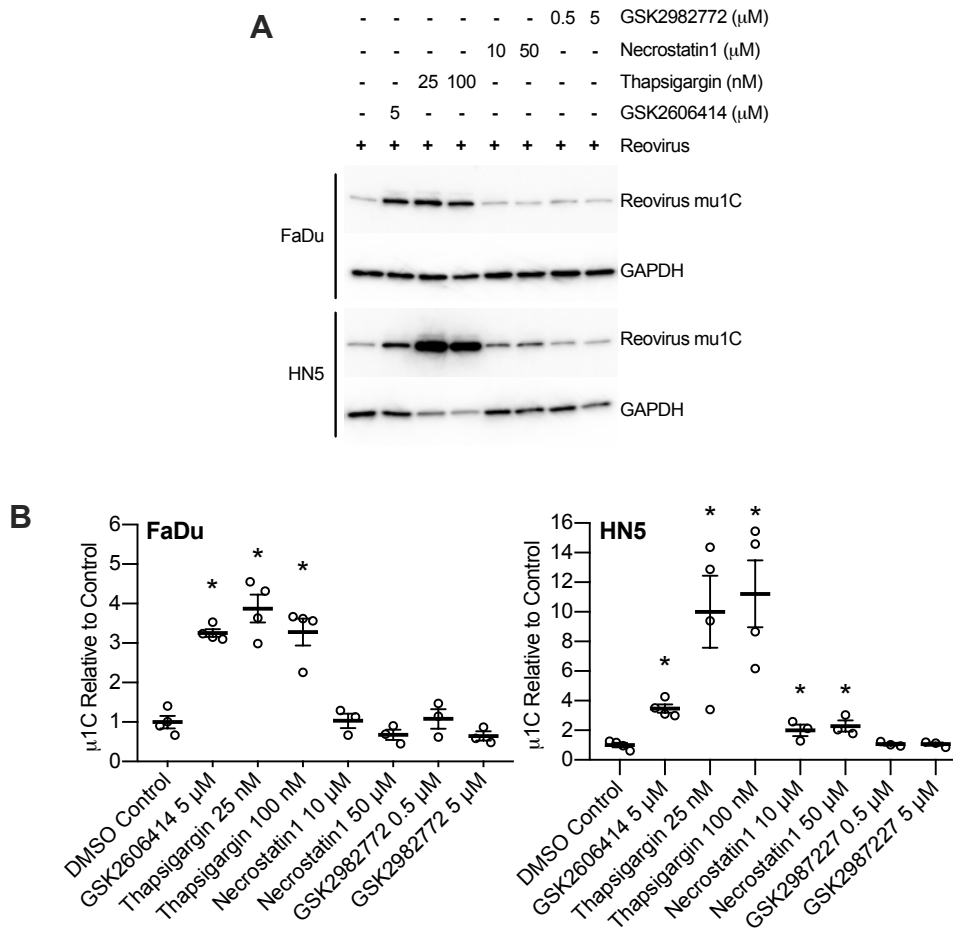

**Supplementary Figure S3. Comparison of GSK2606414, Thapsigargin and RIPK1 inhibitors Necrostatin1 and GSK2982772 on reovirus capsid levels.** (A) FaDu and HN5 cells were treated with reovirus in combination with DMSO only control, GSK2606414, or the RIPK1 inhibitors necrostatin1 and GSK2982772. Cell lysates were collected after 48 h and probed by western blot for the reovirus capsid protein mu1C. (B) Densitometry quantification of reovirus mu1C from western blots. Data is corrected for GAPDH levels and normalised to the average of controls. Data  $\pm$ SEM of a minimum of three independent experiments with statistical analysis by unpaired t-test \*P < 0.05.

**Supplementary Table 1.** Primers used for UPR live cell reporter cloning.

| <b>Reporter</b> | <b>Primer Name</b>                     | <b>Sequence</b>                                                                                                     |
|-----------------|----------------------------------------|---------------------------------------------------------------------------------------------------------------------|
| IRE1<br>endo    | XBP1intron<br>GFPFLAGforward           | GTTGGATCCGCCACCATGCCAGTGGCCGGGTCTGCTGAGTCCGCAGCACTCAGAC<br>TACGTGCACCTCTGCAGCAGGTGCAGGCCAGTTGTTCGTGAGCAAGGGGCGAGGAG |
| IRE1<br>endo    | XBP1intron<br>GFPFLAGreverse           | AATCAGGCGGCCGCTTACTTGTTCGTTCATCGTCTTTGTAGTCC                                                                        |
| ATF4<br>prom    | ATF4 forward                           | TTTCCAGAGTTTAGGAGGAGCCATG                                                                                           |
| ATF4<br>prom    | ATF4 forward + 5'<br>Overlap pHR       | CAGAGATCCAGTTTGGATCGATAAGCTTGATATCGAATTCTTCCAGAGTTTAGGAG<br>GAGCCATG                                                |
| ATF4<br>prom    | ATF4 reverse                           | CATGTTGCGGTGCTTTGCTGGAA                                                                                             |
| ATF4<br>prom    | ATF4 reverse +<br>3'Overlap mCherry    | TGATGATGGCCATGTTATCCTCCTCGCCCTTGCTCACCATGTTGCGGTGCTTTGCTG<br>GAA                                                    |
| ATF4<br>prom    | mCherryMYC forward                     | ATGGTGAGCAAGGGCGAG                                                                                                  |
| ATF4<br>prom    | mCherryMYC reverse +<br>3' Overlap pHR | AGCTTGCATGCCTGCAGGTGCGACTCTAGAGTCGCGGCCGCTTACAGATCCTCTTCT<br>GAGATGAGTTTTTGTTC                                      |
| ATF6<br>bind    | p5xATF6 forward                        | TAGGTCTGAATTCCTCGAGACAGGTGCTGACG                                                                                    |
| ATF6<br>bind    | p5xATF6 reverse                        | AATCAGGGATCCGGAGATCCTCTAGAGTCGACTCTAG                                                                               |

**Supplementary Table 2.** Primers for ATF4 transcript variants 1 and 2. Exon-Exon boundary indicated by /.

| <b>Variant</b> | <b>Primer Name</b>         | <b>Sequence</b>       |
|----------------|----------------------------|-----------------------|
| 2              | ATF4 var2 forward          | AGCCATGGC/GCTTCTCAC   |
|                | ATF4 var2 reverse          | TGGAACACACAGCTACAGCA  |
| 1&2            | ATF4 var1 and var2 forward | ATGGCGTATTAGGGGCAG    |
|                | ATF4 var1 and var2 reverse | AAGGCATCCT/CCTTGCTGTT |
